# Supplementary material for: The novel HSP90 inhibitor AT13387 potentiates radiation effects in squamous cell carcinoma and adenocarcinoma cells
Source: Oncotarget. 2015 Oct 6;6(34):35652–66. doi: 10.18632/oncotarget.5363 (PMC4742132; doi:10.18632/oncotarget.5363)
Supplement: Supplementary file 1 [file oncotarget-06-35652-s001.pdf]

## SUPPLEMENTARY FIGURES AND TABLES

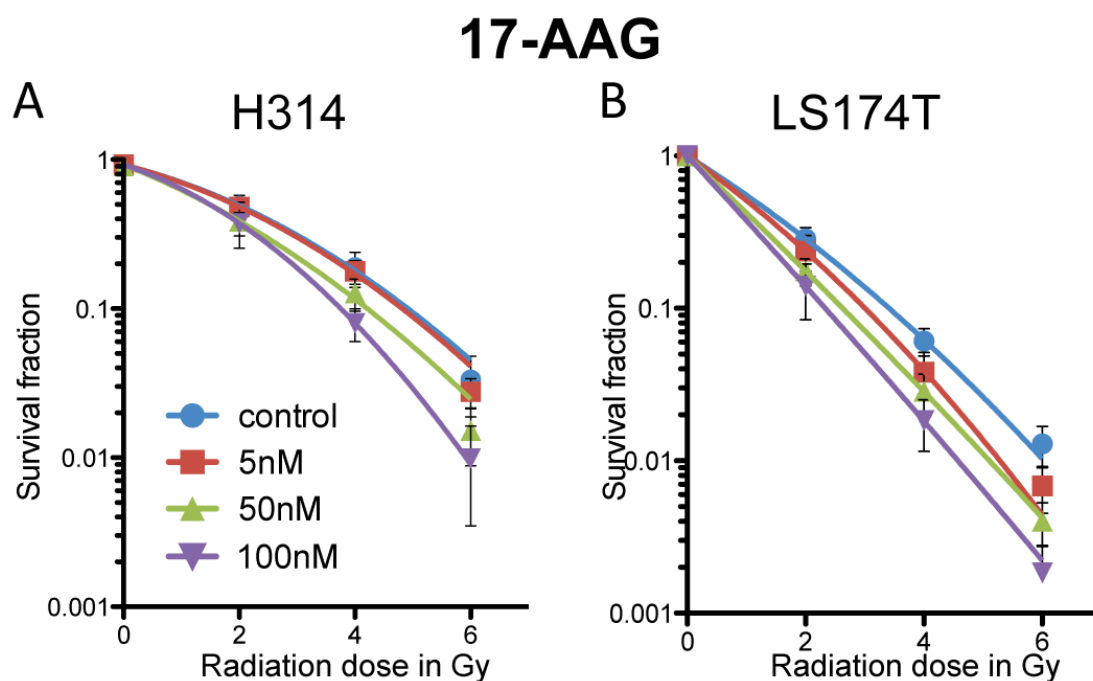

**Supplementary Figure S1: Clonogenic survival assays.** A. H314 and B. LS174T cells treated with 17-AAG (5, 50, 100 nM) and radiation (2, 4 and 6 Gy). The cells were pre-plated in triplicates, incubated with AT13387 24 h later and irradiated 1 h after drug incubation. Colonies with > 50 cells were counted. The error bars represent the standard deviation,  $n \geq 6-12$ . All curves are normalized to the plating efficiency of the non-irradiated controls.

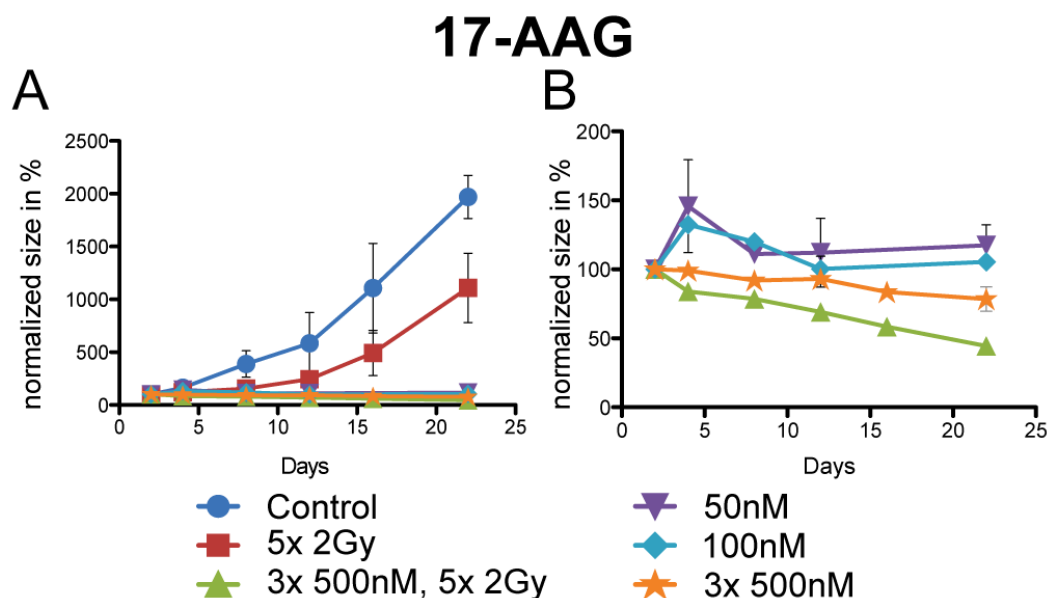

**Supplementary Figure S2: Multicellular tumor spheroid growth.** **A.** H314 cells treated with 17-AAG (50 nM, 100 nM and 3 times 500 nM, see Materials and Methods for details), 5 times 2 Gy radiation fractions and combination treatment of 3 times 500 nM 17-AAG and 5 times 2 Gy. **B.** The right-hand side graph is a closer view of the left-hand side, to better show differences in the low-growth region. 1000–3000 cells were pre-plated in an agarose coated 96-well plates, incubated with 17-AAG after 24 h and irradiated 1 h after drug incubation. The error bars represent standard deviation,  $n \geq 3$ . All curves are normalized to the size of controls at day 1.

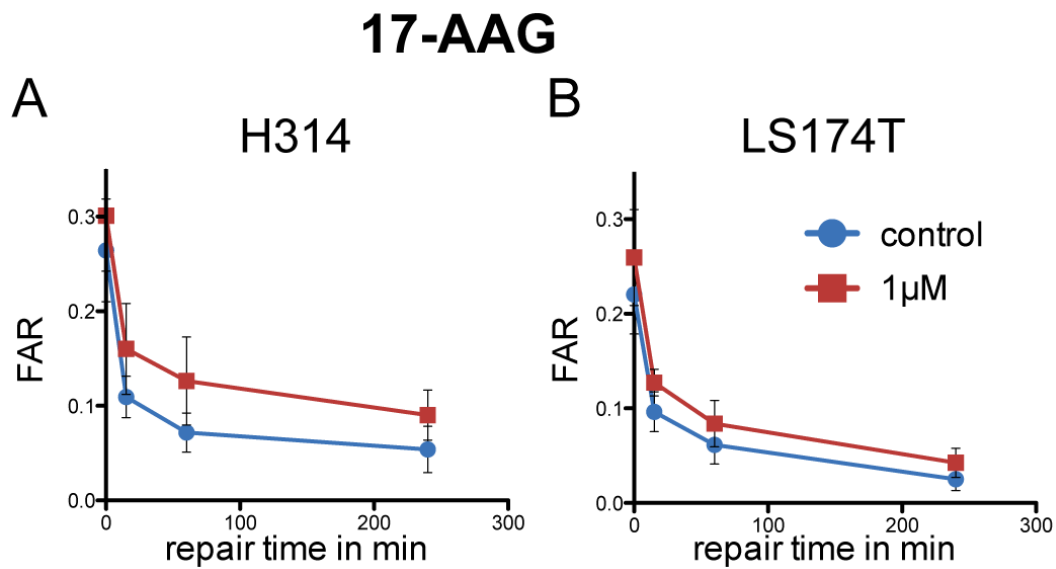

**Supplementary Figure S3: DNA DSB rejoining after irradiation and treatment of HSP90 inhibitors measured by PFGE. A.** H314 and **B.** LS174T cells exposed to 1  $\mu$ M 17-AAG for 24 h prior radiation. After irradiation, cells were allowed to repair. Kinetics of DSB end rejoining was calculated by fraction of activity released (FAR) corresponding to DNA of sizes < 5.7 Mbp. The error bars represent the standard deviation,  $n = 4$ .

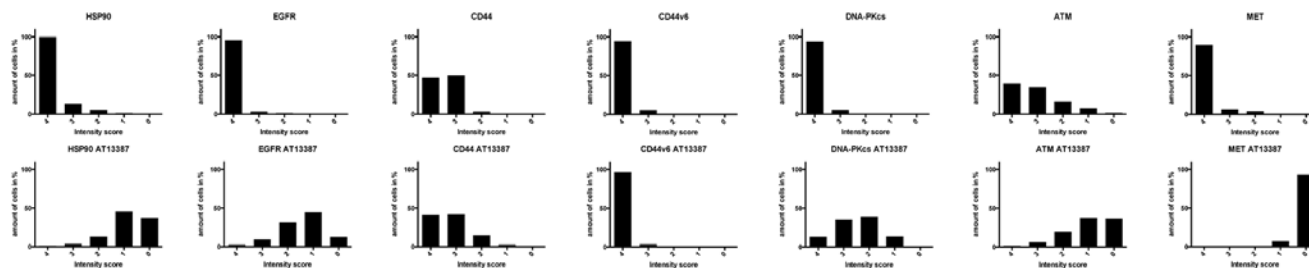

**Supplementary Figure S4: Histogram of IHC intensity distribution.** Scoring intensity of HSP90, EGFR, CD44, CD44v6, DNA-PKcs, ATM and MET immunohistochemistry stainings. 0 = no staining, 1 = weak staining, 2 = moderate staining, 3 = dark staining, 4 = maximum staining.

**Supplementary Table S1: Statistical evaluation of synergy, additivity or antagonism of combined AT13387 and external beam radiation treatment using the synergy model as described by Valeriote [28]**

| AT13387 in nM | Radiation dose in Gy | Statistical evaluation of synergy |          |          |          |
|---------------|----------------------|-----------------------------------|----------|----------|----------|
|               |                      | H314                              | A431     | LS174T   | HCT116   |
| 0.5           | 2                    | ****                              | Additive | Additive | Additive |
| 0.5           | 4                    | ****                              | Additive | Additive | Additive |
| 0.5           | 6                    | ****                              | Additive | Additive | **       |
| 5             | 2                    | **                                | *        | Additive | Additive |
| 5             | 4                    | ****                              | *        | Additive | Additive |
| 5             | 6                    | *                                 | **       | Additive | ****     |
| 50            | 2                    | *                                 | —        | *        | —        |
| 50            | 4                    | —                                 | —        | *        | —        |
| 50            | 6                    | —                                 | —        | ***      | —        |

Survival fractions of combination treatment were compared to expected combination survival calculated from individual treatments using Student's *t*-test.

Additive = no significant difference. Antagonism = significantly higher survival of combination treatment, - no cell survival. For synergy, \*, \*\*, \*\*\* and \*\*\*\* significant  $p < 0.05$ , 0.01, 0.001 and 0.0001, respectively.

**Supplementary Table S2: Combination index (CI) value of the combination therapy of AT13387 and radiation treatment in H314, A431, LS174T and HCT116 cells**

| AT13387 in nM | Radiation dose in Gy | Combination Index |      |          |          |
|---------------|----------------------|-------------------|------|----------|----------|
|               |                      | H314              | A431 | LS174T   | HCT116   |
| 0.5           | 2                    | 0.77              | 0.85 | 0.27     | 0.30     |
| 0.5           | 4                    | 0.84              | 1.02 | 0.08     | 0.06     |
| 0.5           | 6                    | 0.69              | 0.86 | 0.02     | 0.01     |
| 5             | 2                    | 1.15              | 1.85 | 0.30     | 0.21     |
| 5             | 4                    | 0.71              | 1.26 | 0.07     | 0.04     |
| 5             | 6                    | 0.51              | 0.72 | 0.01     | 0.01     |
| 50            | 2                    | 0.09              | 8.41 | 0.04     | 0.06     |
| 50            | 4                    | 0.09              | 0.72 | 2.34E-03 | 5.88E-03 |
| 50            | 6                    | 2.19E-03          | 0.14 | 8.77E-04 | 1.00E-13 |

(CI > 1.1, antagonism;  $0.9 > CI \leq 1.1$ , additive effect;  $0.2 > CI \leq 0.9$ , synergism;  $CI < 0.2$  strong synergism).
